# Supplementary material
Source: HighWire-hosted journal article supplement (https://bmjopen.bmj.com/content/12/8/e060767)
Supplement: inline-supplementary-material-1 [file inline-supplementary-material-1.pdf]

**Supplementary file 1. Search Strategy****Search Strategy for PubMed**

| Number | Search terms                                                                                                                                                                                                                                                                                                                                                                                                                    |
|--------|---------------------------------------------------------------------------------------------------------------------------------------------------------------------------------------------------------------------------------------------------------------------------------------------------------------------------------------------------------------------------------------------------------------------------------|
| #1     | Coronavirus[MeSH Terms]                                                                                                                                                                                                                                                                                                                                                                                                         |
| #2     | coronavirus infections[MeSH Terms]                                                                                                                                                                                                                                                                                                                                                                                              |
| #3     | COVID-19[Title/Abstract] OR COVID-19 pneumonia[Title/Abstract] OR novel coronavirus[Title/Abstract] OR novel coronavirus pneumonia[Title/Abstract] OR coronaviru*[Title/Abstract] OR 2019-ncov [Title/Abstract] OR 2019-ncov pneumonia[Title/Abstract] OR novel cov[Title/Abstract] OR severe acute respiratory syndrome cov2[Title/Abstract] OR SARS-CoV-2[Title/Abstract] OR severe acute respiratory disease[Title/Abstract] |
| #4     | #1 OR #2 OR #3                                                                                                                                                                                                                                                                                                                                                                                                                  |
| #5     | rehabilitation [MeSH Terms]                                                                                                                                                                                                                                                                                                                                                                                                     |
| #6     | rehab*[Title/Abstract] OR respiratory rehabilitation [Title/Abstract] OR pulmonary rehabilitation [Title/Abstract] OR exercise therap* [Title/Abstract] OR physio[Title/Abstract] OR physiotherap*[Title/Abstract] OR physical therap*[Title/Abstract] OR PT[Title/Abstract] OR traditional Chinese medicine rehabilitation [Title/Abstract]                                                                                    |
| #7     | #5 OR #6                                                                                                                                                                                                                                                                                                                                                                                                                        |
| #8     | guideline[Title/Abstract] OR practice guideline[Title/Abstract] OR CPG[Title/Abstract] OR consensus development conference[Title/Abstract] OR consensus[Title/Abstract] OR consensus statement[Title/Abstract] OR expert consensus[Title/Abstract] OR standards[Title/Abstract] OR recommendation[Title/Abstract]                                                                                                               |
| #9     | #4 AND #7 AND #8                                                                                                                                                                                                                                                                                                                                                                                                                |

**Search Strategy for Embase**

| Number | Search terms                                                                                                                                                                                                                                                                                                                                                          |
|--------|-----------------------------------------------------------------------------------------------------------------------------------------------------------------------------------------------------------------------------------------------------------------------------------------------------------------------------------------------------------------------|
| #1     | 'coronavirus disease 2019'/exp                                                                                                                                                                                                                                                                                                                                        |
| #2     | 'covid-19':ti,ab,kw OR 'covid-19 pneumonia':ti,ab,kw OR 'novel coronavirus':ti,ab,kw OR 'novel coronavirus pneumonia':ti,ab,kw OR coronaviru*:ti,ab,kw OR '2019 ncov':ti,ab,kw OR '2019-ncov pneumonia':ti,ab,kw OR 'novel cov':ti,ab,kw OR 'severe acute respiratory syndrome cov2':ti,ab,kw OR 'sars cov 2':ti,ab,kw OR 'severe acute respiratory disease':ti,ab,kw |
| #3     | #1 OR #2                                                                                                                                                                                                                                                                                                                                                              |
| #4     | 'rehabilitation'/exp                                                                                                                                                                                                                                                                                                                                                  |
| #5     | rehab*:ti,ab,kw OR 'respiratory rehabilitation':ti,ab,kw OR 'pulmonary rehabilitation':ti,ab,kw OR 'exercise therap*':ti,ab,kw OR physio:ti,ab,kw OR                                                                                                                                                                                                                  |

|     |                                                                                                                                                                                                                                                            |
|-----|------------------------------------------------------------------------------------------------------------------------------------------------------------------------------------------------------------------------------------------------------------|
|     | physiotherap*:ti,ab,kw OR 'physical therap*':ti,ab,kw OR pt:ti,ab,kw OR 'traditional chinese medicine rehabilitation':ti,ab,kw                                                                                                                             |
| #6  | #4 OR #5                                                                                                                                                                                                                                                   |
| #7  | 'guideline'/exp                                                                                                                                                                                                                                            |
| #8  | guideline:ti,ab,kw OR 'practice guideline':ti,ab,kw OR cpg:ti,ab,kw OR 'consensus development conference':ti,ab,kw OR consensus:ti,ab,kw OR 'consensus statement':ti,ab,kw OR 'expert consensus':ti,ab,kw OR standards:ti,ab,kw OR recommendation:ti,ab,kw |
| #9  | #7 OR #8                                                                                                                                                                                                                                                   |
| #10 | #3 AND #6 AND #9                                                                                                                                                                                                                                           |

### Search Strategy for CBM

| Number | Search terms                                                                                                                      |
|--------|-----------------------------------------------------------------------------------------------------------------------------------|
| #1     | COVID-19 OR SARS-CoV-2 OR 冠状病毒 OR 严重急性呼吸综合征 OR 非典型肺炎 OR 2019 新型冠状病毒 OR 肺炎 OR 呼吸衰竭[常用字段:智能]                                        |
| #2     | 康复 OR 呼吸康复 OR 肺康复 OR 运动训练 OR 物理疗法 OR 中医康复 OR 太极拳 OR 八段锦 OR 六字诀 OR 传统功法 OR 冥想 OR 针刺 OR 艾灸 OR 针灸 OR 灸法 OR 穴位敷贴 OR 推拿 OR 按摩[常用字段:智能] |
| #3     | 指南 OR 专家共识 OR 专家意见 OR 指导意见 OR 建议 OR 方案 OR 标准 OR 规范 OR 推荐 OR 共识声明[常用字段:智能]                                                         |
| #4     | #1 AND #2 AND #3                                                                                                                  |

### Search Strategy for VIP

| Number | Search terms                                                                                                                    |
|--------|---------------------------------------------------------------------------------------------------------------------------------|
| #1     | 题名或关键词:COVID-19 OR SARS-CoV-2 OR 冠状病毒 OR 严重急性呼吸综合征 OR 非典型肺炎 OR 2019 新型冠状病毒 OR 肺炎 OR 呼吸衰竭                                        |
| #2     | 题名或关键词:康复 OR 呼吸康复 OR 肺康复 OR 运动训练 OR 物理疗法 OR 中医康复 OR 太极拳 OR 八段锦 OR 六字诀 OR 传统功法 OR 冥想 OR 针刺 OR 艾灸 OR 针灸 OR 灸法 OR 穴位敷贴 OR 推拿 OR 按摩 |
| #3     | 题名或关键词:指南 OR 专家共识 OR 专家意见 OR 指导意见 OR 建议 OR 方案 OR 标准 OR 规范 OR 推荐 OR 共识声明                                                         |
| #4     | #1 AND #2 AND #3                                                                                                                |

### Search Strategy for Wan Fang database

| Number | Search terms                                                                              |
|--------|-------------------------------------------------------------------------------------------|
| #1     | 题名或关键词:COVID-19 OR SARS-CoV-2 OR 冠状病毒 OR 严重急性呼吸综合征 OR 非典型肺炎 OR 019 新型冠状病毒 OR 肺炎 OR 呼吸衰竭   |
| #2     | 题名或关键词:康复 OR 呼吸康复 OR 肺康复 OR 运动训练 OR 物理疗法 OR 太极拳 OR 中医康复 OR 八段锦 OR 六字诀 OR 传统功法 OR 冥想 OR 针刺 |

|    |                                                                                                                  |
|----|------------------------------------------------------------------------------------------------------------------|
| #3 | OR 艾灸 OR 针灸 OR 灸法 OR 穴位敷贴 OR 推拿 OR 按摩<br>题名或关键词:指南 OR 专家共识 OR 专家意见 OR 指导意见 OR 建议 OR 方案 OR 标准 OR 规范 OR 推荐 OR 共识声明 |
| #4 | #1 AND #2 AND #3                                                                                                 |

### Search Strategy for CNKI

| Number | Search terms                                                                            |
|--------|-----------------------------------------------------------------------------------------|
| #1     | SU='COVID-19'+SARS-CoV-2'+冠状病毒'+严重急性呼吸综合征'+非典型肺炎'+2019 新型冠状病毒'+肺炎'+呼吸衰竭'                |
| #2     | SU='康复'+呼吸康复'+肺康复'+运动训练'+物理疗法'+中医康复'+太极拳'+八段锦'+六字诀'+传统功法'+冥想'+针刺'+艾灸'+灸法'+穴位敷贴'+推拿'+按摩' |
| #3     | SU='指南'+专家共识'+专家意见'+指导意见'+建议'+方案'+标准'+规范'+推荐'+共识声明'                                     |
| #4     | #1 AND #2 AND #3                                                                        |

SU=主题

### Search Strategy for NGC, GIN, SIGN, NICE and WHO

| Number | Search terms                                                                                                                                                                                                                                  |
|--------|-----------------------------------------------------------------------------------------------------------------------------------------------------------------------------------------------------------------------------------------------|
| #1     | COVID-19 OR COVID-19 pneumonia OR novel coronavirus OR novel coronavirus pneumonia OR coronaviru OR 2019-ncov OR 2019-ncov pneumonia OR novel cov OR severe acute respiratory syndrome cov2 OR SARS-CoV-2 OR severe acute respiratory disease |
| #2     | rehabilitation OR respiratory rehabilitation OR pulmonary rehabilitation OR exercise therapy OR OR physiotherapy OR physical therapy OR traditional Chinese medicine rehabilitation                                                           |
| #3     | #1 AND #2                                                                                                                                                                                                                                     |
